# Supplementary material for: A physics-aware neural network for protein–ligand interactions with quantum chemical accuracy
Source: Royal Society of Chemistry journal article supplement (doi:10.1039/d4sc01029a), 2024-01-01
Supplement: d4sc01029a1.pdf [file d4sc01029a1.pdf]

***Electronic Supplementary Information for***  
**A Physics-Aware Neural Network for Protein-Ligand Interactions with Quantum  
Chemical Accuracy**

Zachary L. Glick,<sup>1</sup> Derek P. Metcalf,<sup>1</sup> Caroline S. Glick,<sup>1</sup> Steven A. Spronk,<sup>2</sup> Alexios  
Koutsoukas,<sup>2</sup> Daniel L. Cheney,<sup>2</sup> and C. David Sherrill<sup>1</sup>

<sup>1</sup>*Center for Computational Molecular Science and Technology,  
School of Chemistry and Biochemistry, and School of Computational Science  
and Engineering, Georgia Institute of Technology, Atlanta, Georgia 30332-0400,  
USA*

<sup>2</sup>*Molecular Structure and Design, Bristol Myers Squibb Company, P. O. Box 5400,  
Princeton, NJ 08543*

TABLE S1. Difference in interaction energies ( $\text{kcal mol}^{-1}$ ) for alchemical substitutions in nine protein-ligand complexes. The PDB entry of the crystallographic structures from which each dimer pair was derived is given. The interaction energies are decomposed into the four SAPT components.

| PDB Entry | Electrostatics $\Delta\Delta E$ |        | Exchange $\Delta\Delta E$ |        | Induction $\Delta\Delta E$ |        | Dispersion $\Delta\Delta E$ |        |
|-----------|---------------------------------|--------|---------------------------|--------|----------------------------|--------|-----------------------------|--------|
|           | SAPT0                           | AP-Net | SAPT0                     | AP-Net | SAPT0                      | AP-Net | SAPT0                       | AP-Net |
| 2CJI      | -2.32                           | -2.43  | +2.38                     | +2.77  | -0.34                      | -0.26  | -1.78                       | -1.75  |
| 2O7N      | +1.36                           | +0.80  | +4.66                     | +5.40  | +0.54                      | +0.44  | -2.39                       | -2.37  |
| 2PR3      | -0.63                           | -0.85  | +0.43                     | +0.63  | -0.01                      | -0.13  | -0.82                       | -1.06  |
| 2UZT      | -0.14                           | +0.05  | +1.04                     | +1.33  | -0.40                      | -0.25  | -0.33                       | -0.21  |
| 2W26      | -2.37                           | -3.37  | +2.47                     | +4.91  | -0.09                      | -0.68  | -2.01                       | -1.86  |
| 2Y5(G/H)  | -3.69                           | -4.35  | +1.24                     | +1.65  | -0.06                      | +0.09  | -0.96                       | -1.04  |
| 3ENS      | -5.89                           | -4.39  | +8.12                     | +8.43  | -1.90                      | -1.73  | -5.29                       | -5.26  |
| 4YFF      | +0.86                           | +0.48  | -0.14                     | -0.16  | +0.11                      | +0.04  | +0.03                       | +0.02  |
| 4YHT      | -2.32                           | -3.01  | +0.84                     | +0.90  | +0.07                      | +0.01  | -0.82                       | -0.87  |

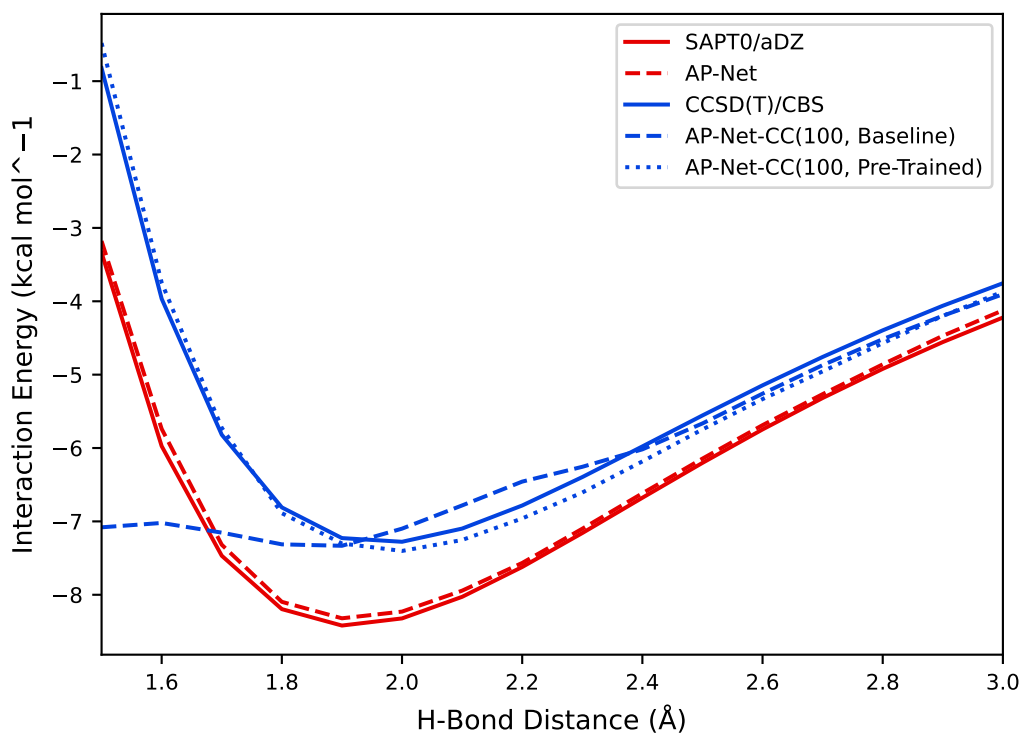

FIG. S1. A one-dimensional slice of the two-dimensional NMA dimer interaction energy scan. In this figure, the hydrogen bond angle is fixed at  $0^\circ$  and the hydrogen bond distance is varied.
